# Supplementary material for: Isopolymolybdate-induced organic–inorganic hybrid assemblies with copper ions and bichelate-bridging ligands
Source: Royal Society of Chemistry journal article supplement (doi:10.1039/c4ce01591f), 2014-01-01
Supplement: c4ce01591f1.pdf [file c4ce01591f1.pdf]

## Supporting Information

### **Isopolymolybdate-induced organic-inorganic hybrid assemblies with copper ions and bichelate-bridging ligands**

**Xiu-Li Hao,<sup>a,b</sup> Yuan-Yuan Ma,<sup>a</sup> Yong-Hui Wang,<sup>a</sup> Hong-Ying Zang<sup>\*a</sup> and Yang-Guang Li<sup>\*a</sup>**

*†Key Laboratory of Polyoxometalate Science of Ministry of Education, Faculty of Chemistry, Northeast Normal University, Renmin Street No. 5268, Changchun, Jilin 130024, P.R. China*

*‡School of Chemical and Biological Engineering, Tai Yuan Science and Technology University, Taiyuan 030012, PR China*

#### **Contents**

1. Additional structural figures for compounds **1-7**
2. Selected bond lengths and angles for compounds **1-7**
3. Additional characterization for compounds **1-7**

## 1. Additional structural figures for compound 1-7

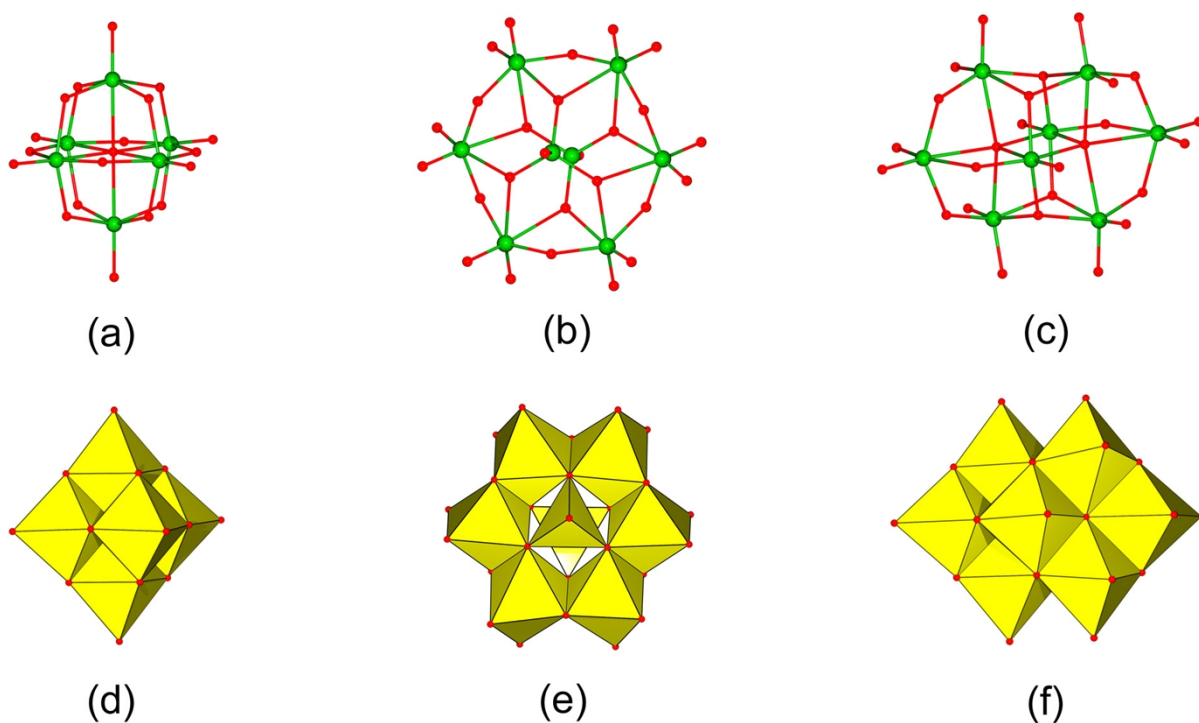

**Figure S1** Ball-and-stick and polyhedral structural view of Lindqvist-type  $[\text{Mo}_6\text{O}_{19}]^{2-}$  (a) and (d),  $\alpha$ - $[\text{Mo}_8\text{O}_{26}]^{4-}$  (b) and (e), and  $\beta$ - $[\text{Mo}_8\text{O}_{26}]^{4-}$  (c) and (f) POM units.

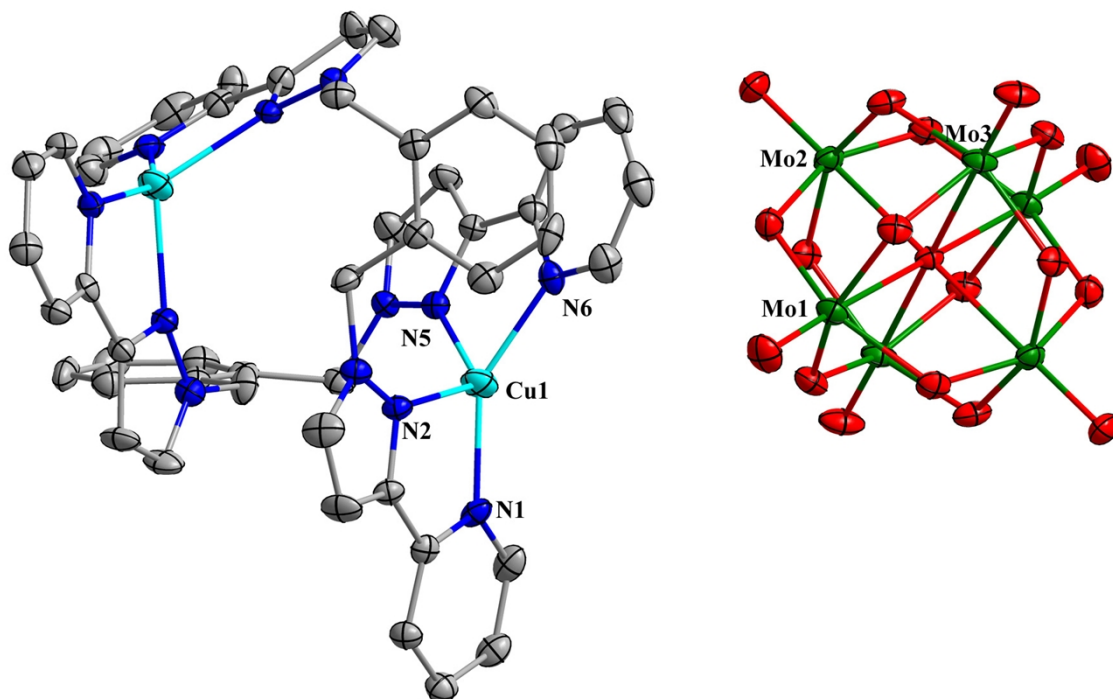

**Figure S2** ORTEP diagram of structure of **1** with thermal ellipsoids at 30% probability displacement. All H atoms are omitted for clarity.

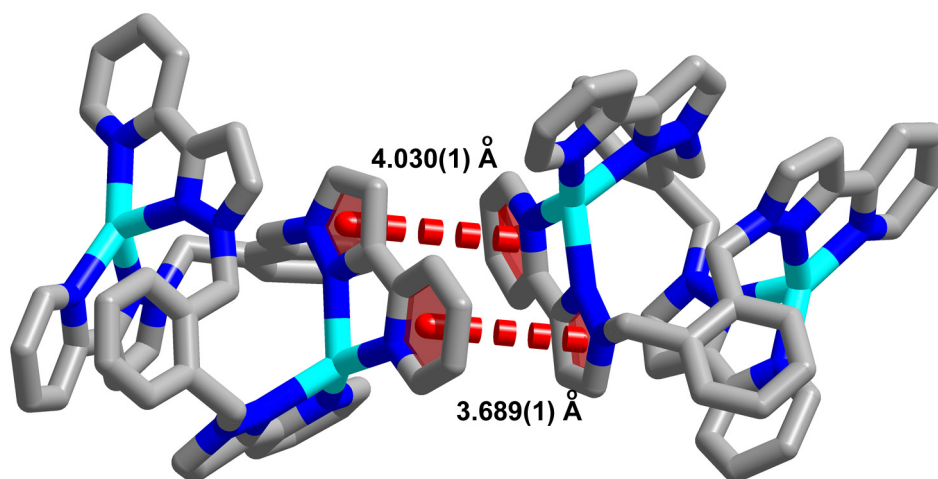

**Figure S3** The typical  $\pi \dots \pi$  interactions between two adjacent binuclear  $[\text{Cu}^{\text{I}}_2\text{L}o_2]^{2+}$  units in **1**. The distances between two adjacent aromatic planes are ca. 3.689(1) Å and ca. 4.030(1) Å.

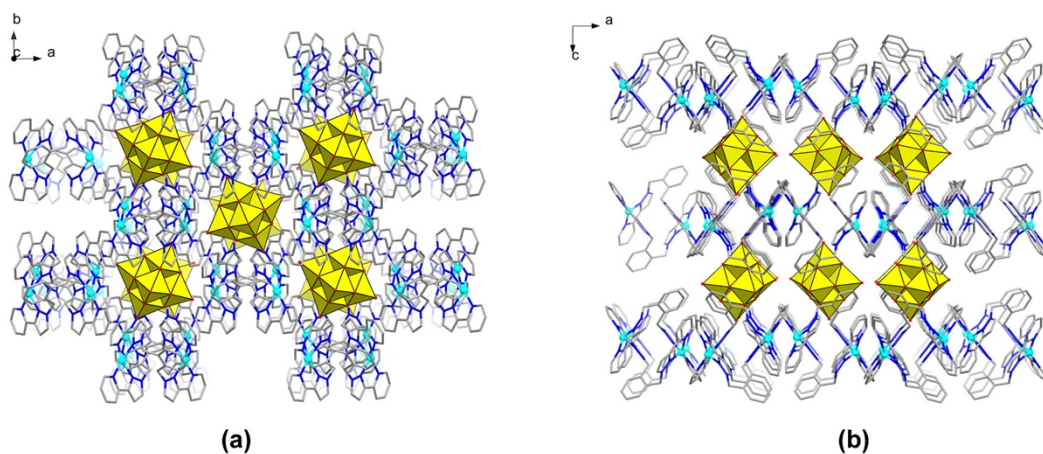

**Figure S4** Packing arrangements of **1** viewed along *c* (a) and *b* (b) axis.

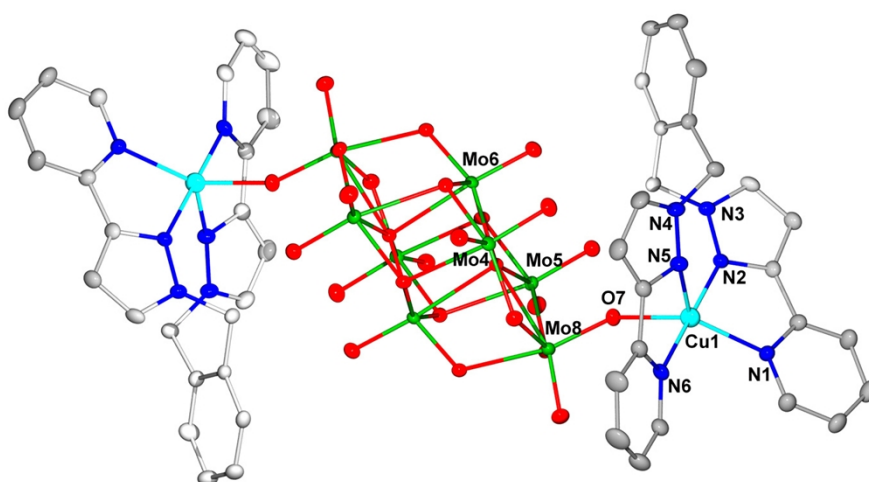

**Figure S5** ORTEP diagram of structure of **2** with thermal ellipsoids at 30% probability displacement. All H atoms are omitted for clarity.

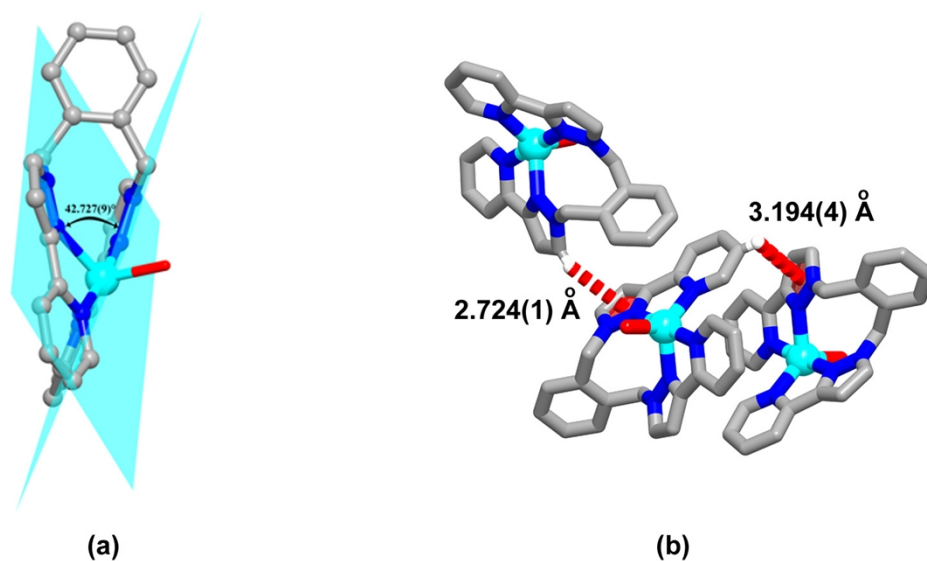

**Figure S6** (a) The dihedral angle of the two bppmb planes in the [CuLo] unit of **2**;  
 (b) The typical C-H... $\pi$  interactions among adjacent [CuLo] units in **2**

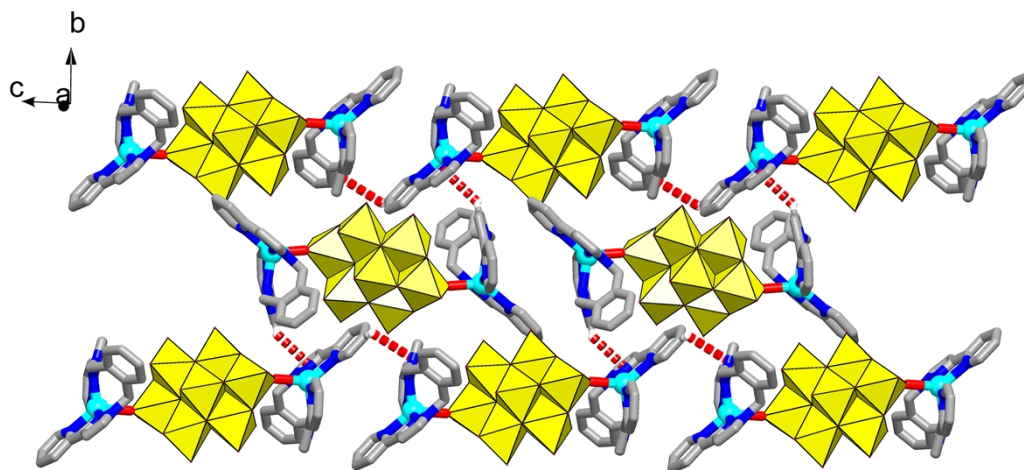

**Figure S7** The 2-D supramolecular layer of **2** in *bc* plane, formed by adjacent hybrid molecules via the weak C-H... $\pi$  interactions.



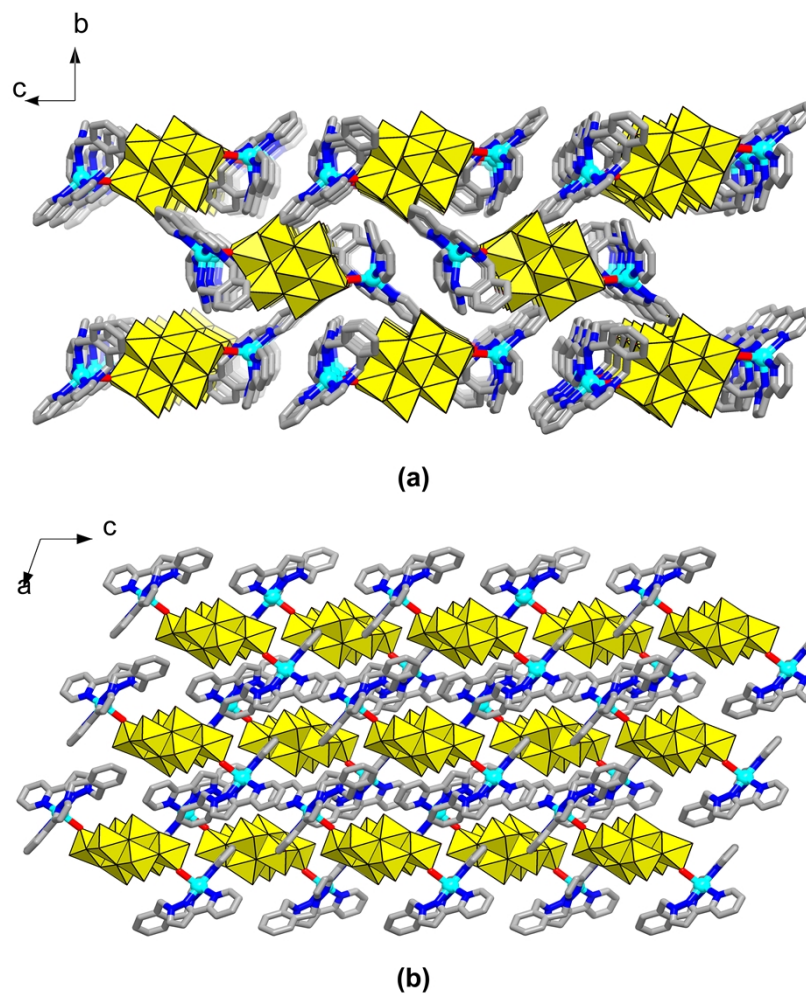

**Figure S8** Packing arrangements of **2** viewed along *a* (a) and *b* (b) axis.

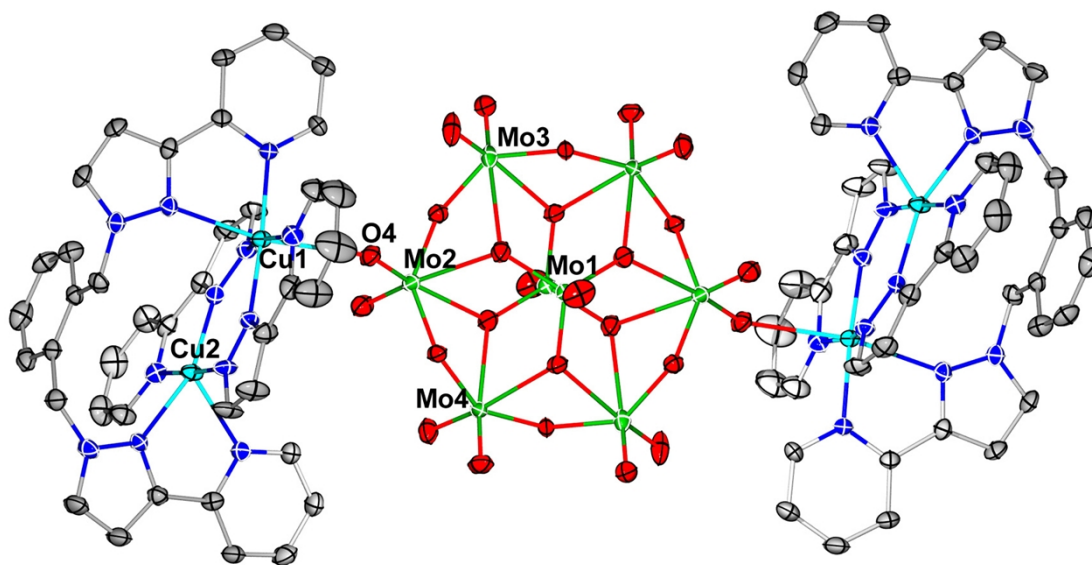

**Figure S9** ORTEP diagram of structure of **3** with thermal ellipsoids at 30% probability displacement. All H atoms are omitted for clarity.

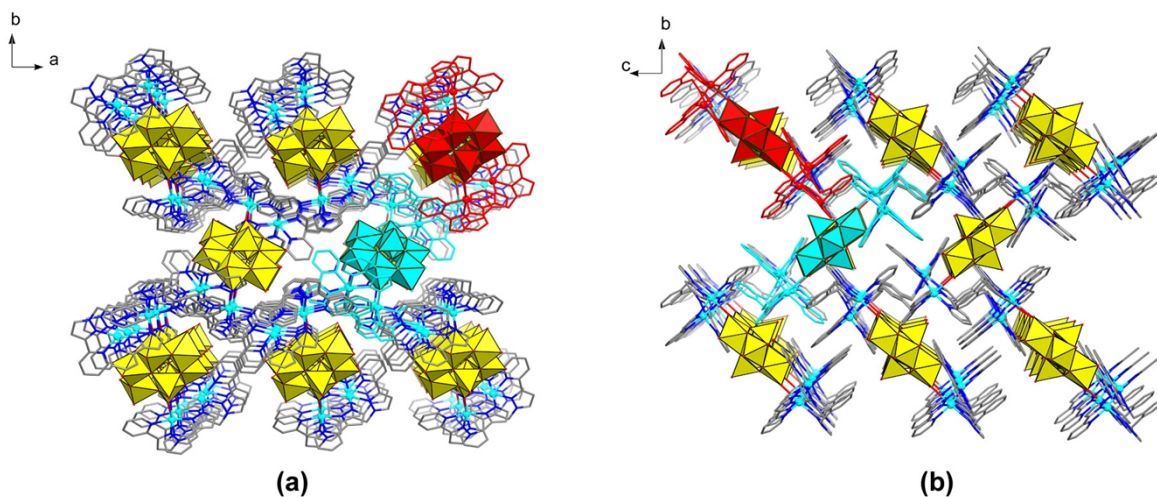

**Figure S10** Packing arrangements of compound **3** viewed along *c* (a) and *a* (b) axis. The all red and blue hybrid molecules show two kinds of orientations of compound **3** in the packing arrangement.

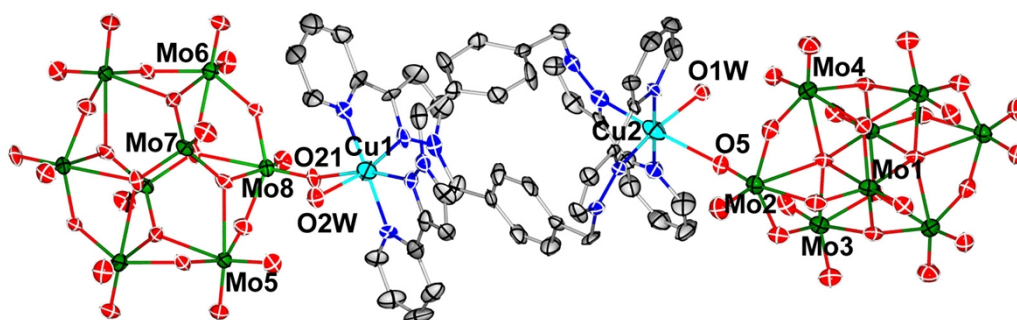

**Figure S11** ORTEP diagram of structure of **4** with thermal ellipsoids at 30% probability displacement. All H atoms are omitted for clarity.

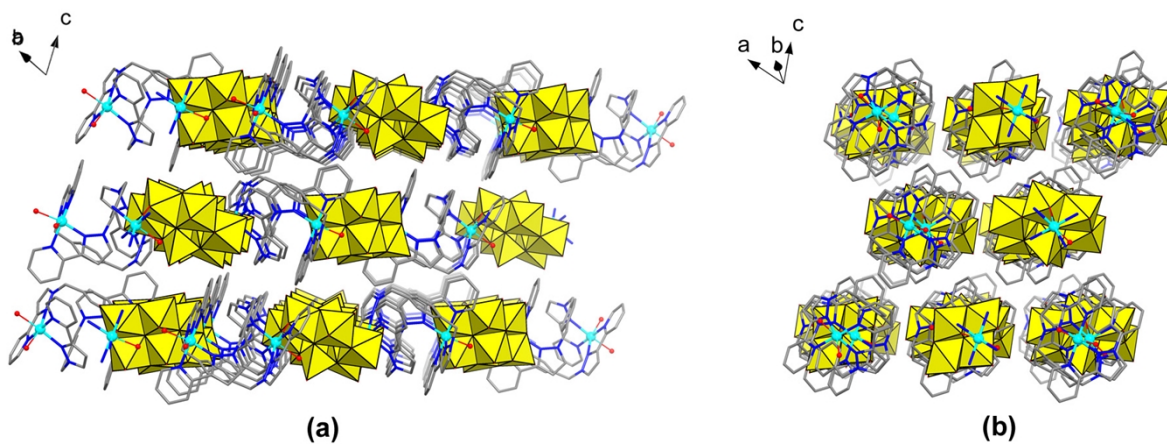

**Figure S12** Packing arrangements of compound **4**, showing that there are no obvious intermolecular interactions among the adjacent hybrid chains.

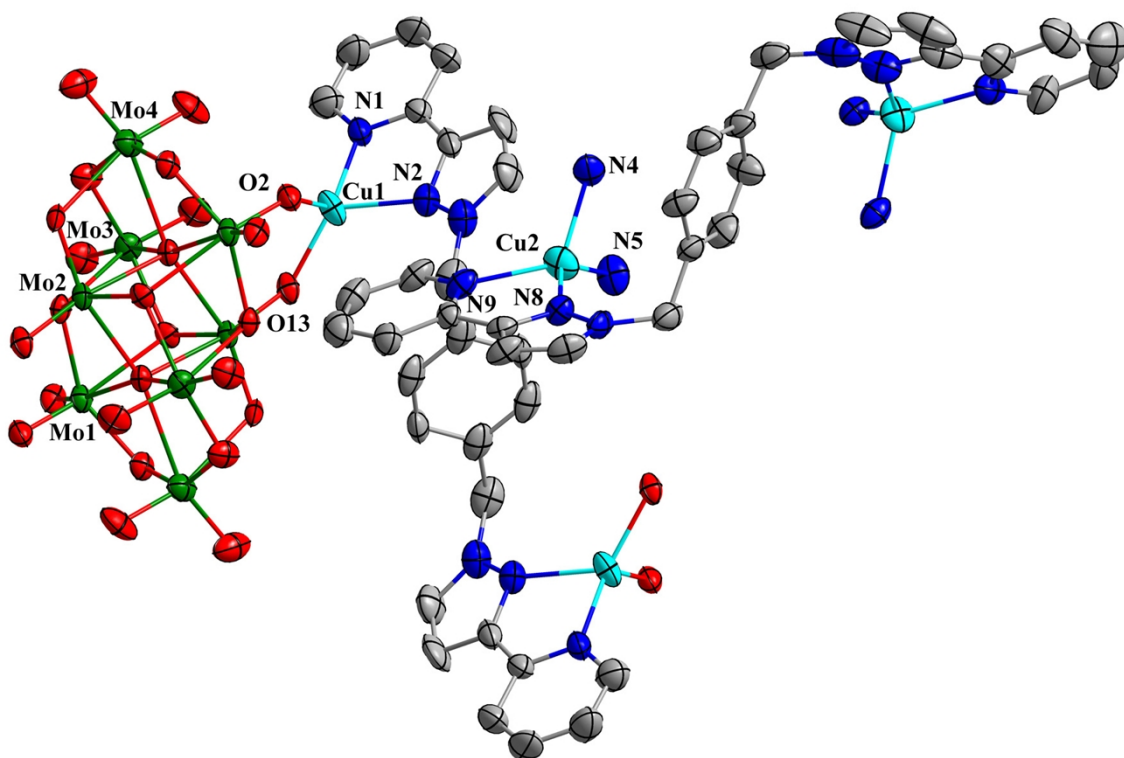

**Figure S13** ORTEP diagram of structure of **5** with thermal ellipsoids at 30% probability displacement. All H atoms are omitted for clarity.

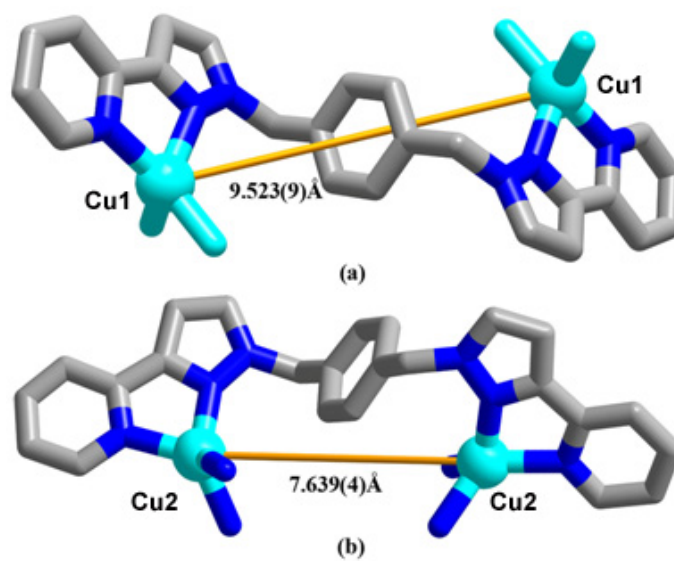

**Figure S14** Configurations of *Lp* ligands with (a) Cu(1) and (b) Cu(2) centers in **5**.



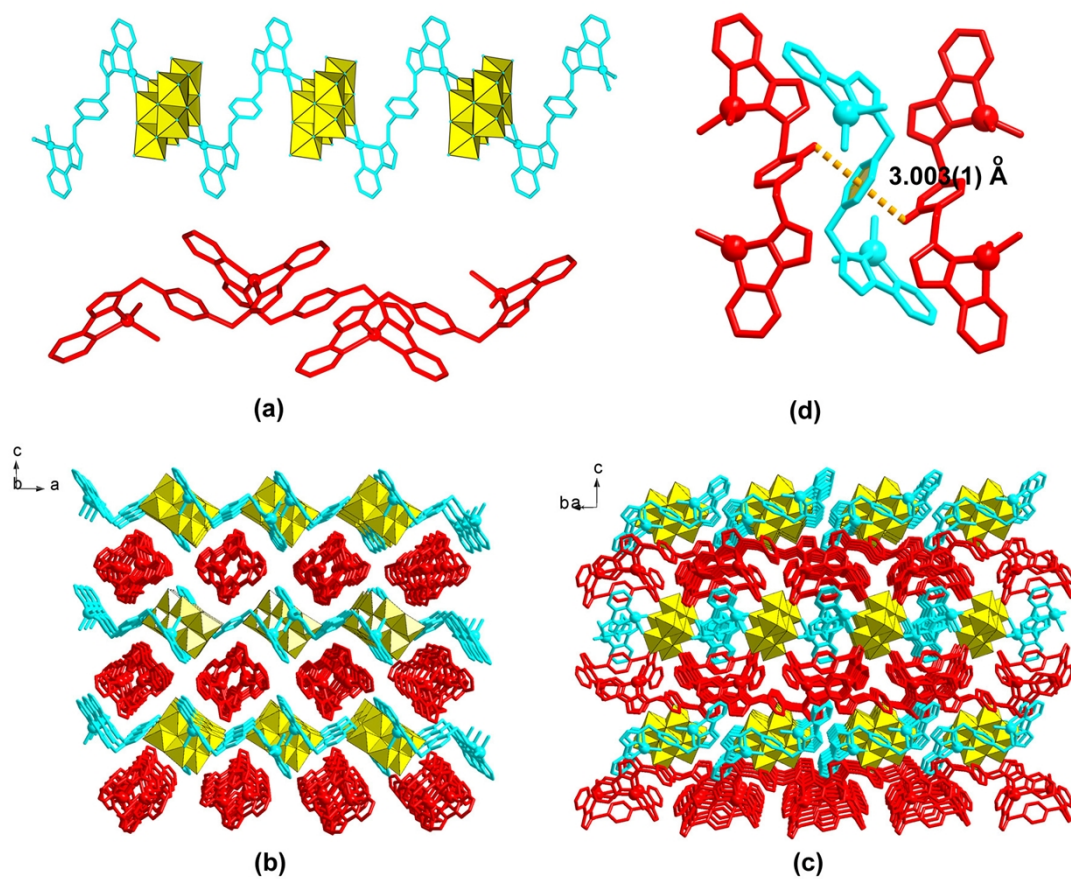

**Figure S15** (a) View of two kinds of chainlike building blocks in **5**; (b) and (c) Packing arrangements of **5**; (d) The weak C-H... $\pi$  interactions between adjacent chains in **5**

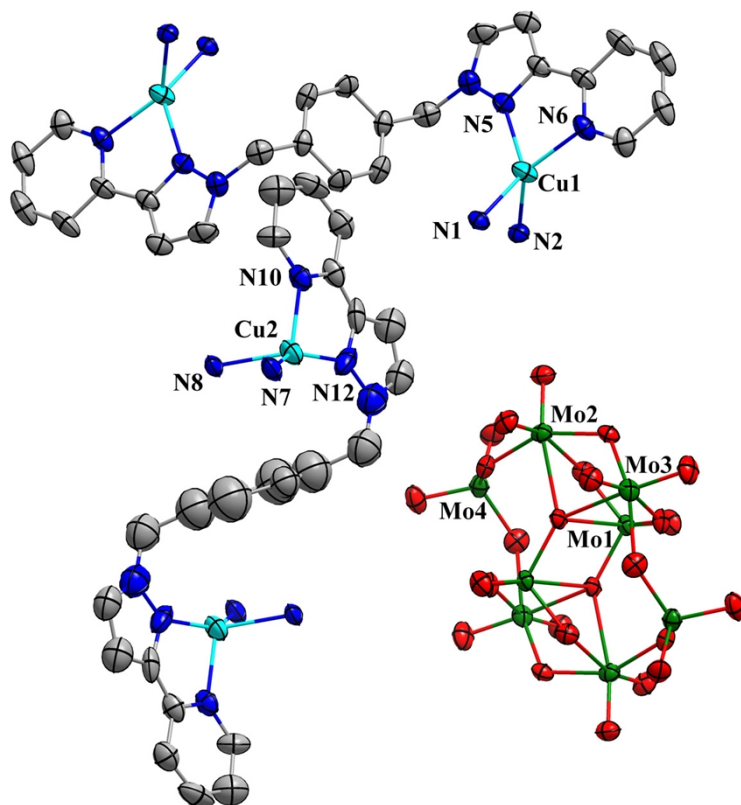

**Figure S16** ORTEP diagram of structure of **6** with thermal ellipsoids at 30% probability displacement. All H atoms are omitted for clarity.

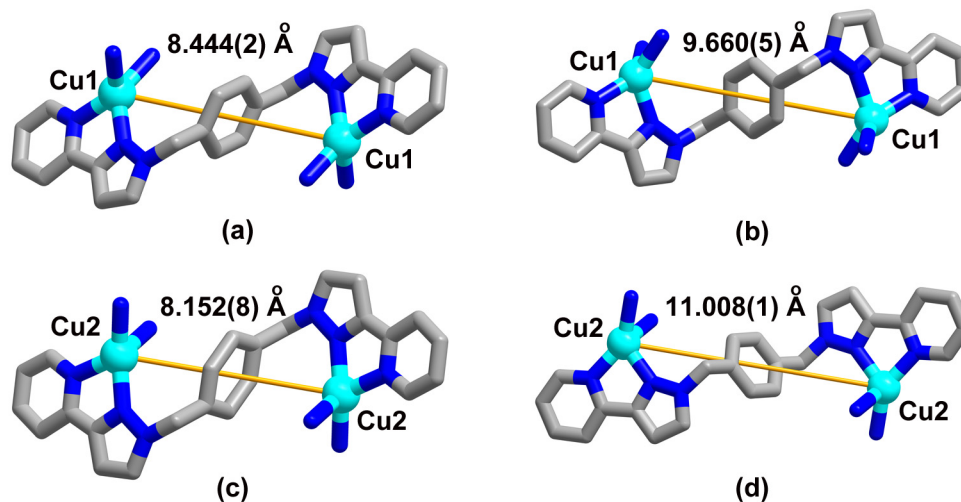

**Figure S17** Four kinds of configurations of *Lp* ligands in compound **6**, (a)  $Lp^1$ , (b)  $Lp^2$ , (c)  $Lp^3$  and (d)  $Lp^4$

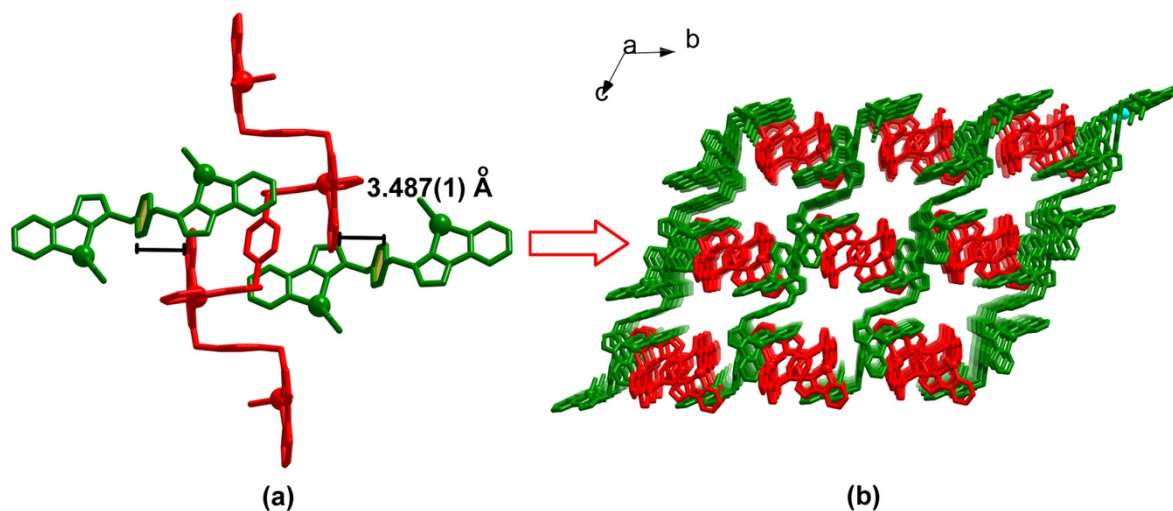

**Figure S18** (a) The  $\pi$ ... $\pi$  interactions between adjacent chains in compound **6**. The distance between two adjacent benzene planes is ca. 3.487(1) Å; (b) Packing arrangement of two kinds of chains in **6**. The POM units in the cavities of 3-D supramolecular framework are omitted for clarity.

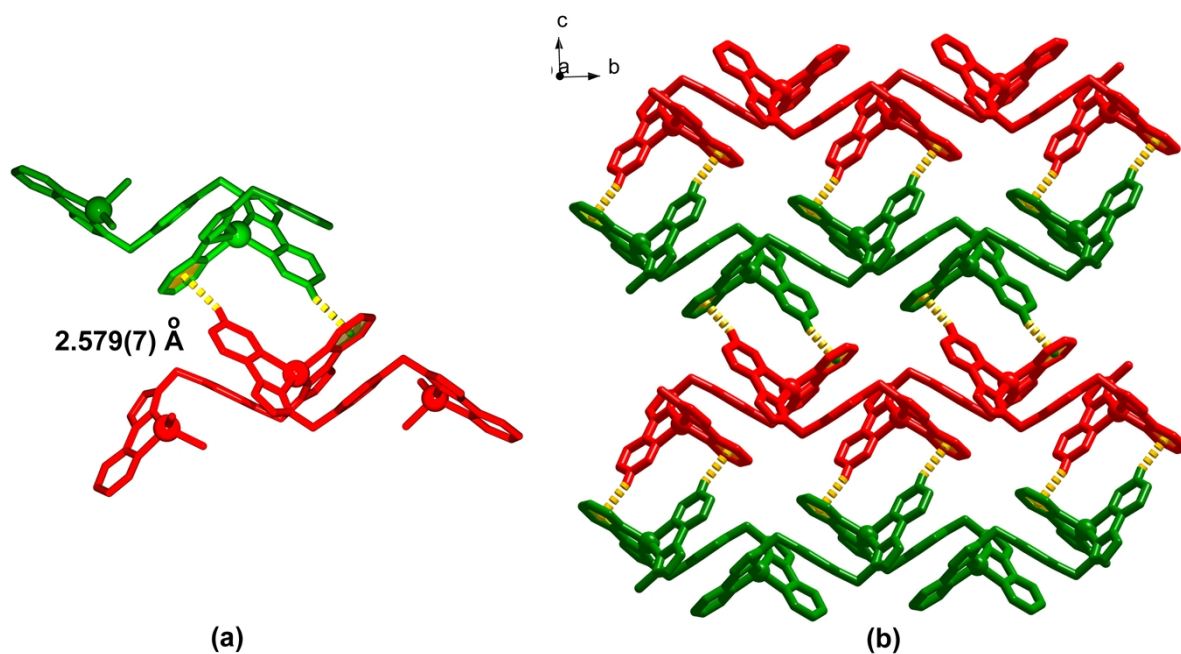

**Figure S19** The C-H... $\pi$  intermolecular interactions between adjacent chains on the *bc* plane

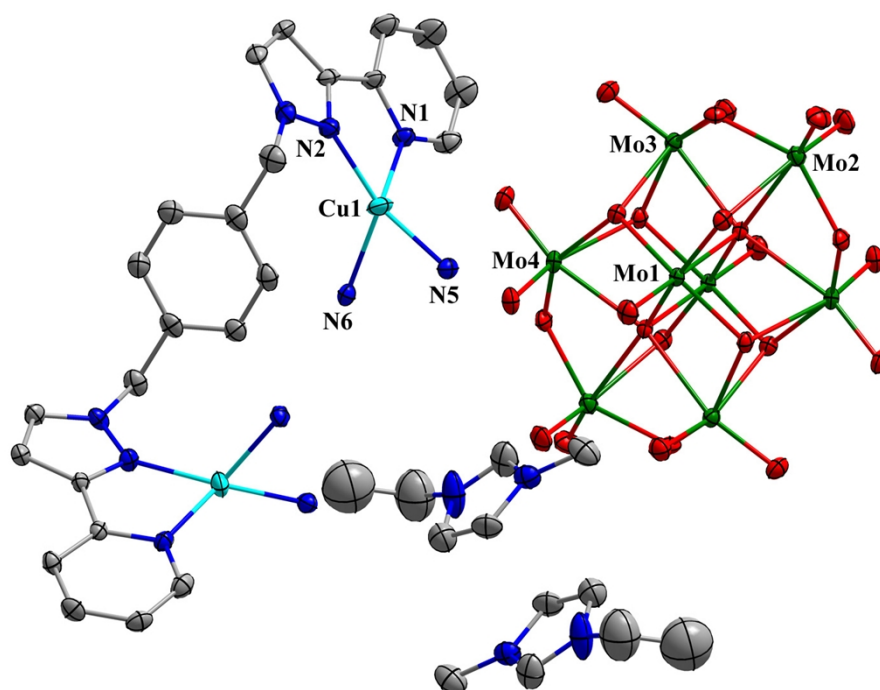

**Figure S20** ORTEP diagram of structure of **7** with thermal ellipsoids at 30% probability displacement. All H atoms are omitted for clarity.



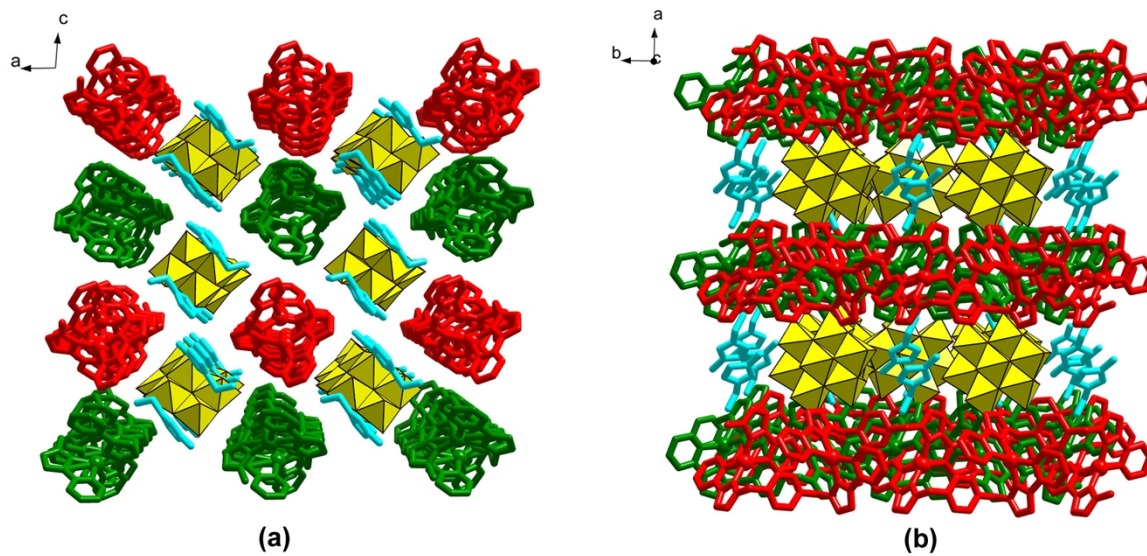

**Figure S21** Packing arrangements of compound 7 viewed along (a) *b* axis and (b) *c* axis

## 2. Selected bond lengths and angles for compounds 1-7

**Table S1.** Selected bond lengths (Å) and angles (deg) of **1**.

|                     |            |                   |            |
|---------------------|------------|-------------------|------------|
| Cu(1)-N(1)          | 2.021(5)   | Cu(1)-N(6)#1      | 2.029(5)   |
| Cu(1)-N(5)#1        | 2.107(5)   | Cu(1)-N(2)        | 2.122(5)   |
| N(1)-Cu(1)-N(6)#1   | 146.5(2)   | N(1)-Cu(1)-N(5)#1 | 122.46(19) |
| N(6)#1-Cu(1)-N(5)#1 | 80.7(2)    | N(1)-Cu(1)-N(2)   | 80.82(19)  |
| N(6)#1-Cu(1)-N(2)   | 110.30(19) | N(5)#1-Cu(1)-N(2) | 119.34(19) |

Symmetry transformations used to generate equivalent atoms: #1 -x,y,-z+1/2 #2 -x+1,-y+1,-z

**Table S2.** Selected bond lengths (Å) and angles (deg) of **2**.

|                 |            |                 |            |
|-----------------|------------|-----------------|------------|
| Cu(1)-N(2)      | 1.957(3)   | Cu(1)-N(6)      | 1.987(3)   |
| Cu(1)-O(7)      | 2.063(2)   | Cu(1)-N(1)      | 2.085(3)   |
| Cu(1)-N(5)      | 2.140(3)   | N(2)-Cu(1)-N(6) | 176.24(13) |
| N(2)-Cu(1)-O(7) | 94.04(11)  | N(6)-Cu(1)-O(7) | 88.52(11)  |
| N(2)-Cu(1)-N(1) | 80.18(12)  | N(6)-Cu(1)-N(1) | 99.94(13)  |
| O(7)-Cu(1)-N(1) | 135.16(12) | N(2)-Cu(1)-N(5) | 96.62(12)  |
| N(6)-Cu(1)-N(5) | 80.09(13)  | O(7)-Cu(1)-N(5) | 103.22(12) |
| N(1)-Cu(1)-N(5) | 121.58(12) |                 |            |

Symmetry transformations used to generate equivalent atoms: #1 -x+2,-y,-z+1

**Table S3.** Selected bond lengths (Å) and angles (deg) of **3**.

|                  |            |                   |            |
|------------------|------------|-------------------|------------|
| Cu(1)-N(8)       | 1.960(5)   | Cu(1)-N(12)       | 1.974(5)   |
| Cu(1)-N(6)       | 2.042(4)   | Cu(1)-N(7)        | 2.059(5)   |
| Cu(1)-N(5)       | 2.315(4)   | Cu(2)-N(9)        | 1.951(5)   |
| Cu(2)-N(11)      | 1.964(4)   | Cu(2)-N(10)       | 2.040(5)   |
| Cu(2)-N(2)       | 2.115(4)   | Cu(2)-N(1)        | 2.221(5)   |
| Cu(1)-O(4)       | 2.594(0)   |                   |            |
| N(8)-Cu(1)-N(12) | 96.47(19)  | N(8)-Cu(1)-N(6)   | 168.8(2)   |
| N(12)-Cu(1)-N(6) | 93.19(19)  | N(8)-Cu(1)-N(7)   | 80.7(2)    |
| N(12)-Cu(1)-N(7) | 168.34(19) | N(6)-Cu(1)-N(7)   | 90.9(2)    |
| N(8)-Cu(1)-N(5)  | 97.94(18)  | N(12)-Cu(1)-N(5)  | 92.77(18)  |
| N(6)-Cu(1)-N(5)  | 75.89(17)  | N(7)-Cu(1)-N(5)   | 98.82(18)  |
| O(4)-Cu(1)-N(5)  | 169.05(41) | O(4)-Cu(1)-N(6)   | 93.16(72)  |
| O(4)-Cu(1)-N(7)  | 81.77(72)  | O(4)-Cu(1)-N(8)   | 92.98(32)  |
| O(4)-Cu(1)-N(12) | 87.06(82)  | N(9)-Cu(2)-N(11)  | 96.67(19)  |
| N(9)-Cu(2)-N(10) | 177.1(2)   | N(11)-Cu(2)-N(10) | 80.99(19)  |
| N(9)-Cu(2)-N(2)  | 90.52(18)  | N(11)-Cu(2)-N(2)  | 159.95(18) |
| N(10)-Cu(2)-N(2) | 91.15(18)  | N(9)-Cu(2)-N(1)   | 95.53(18)  |
| N(11)-Cu(2)-N(1) | 121.95(18) | N(10)-Cu(2)-N(1)  | 87.19(18)  |
| N(2)-Cu(2)-N(1)  | 75.64(17)  |                   |            |

Symmetry transformations used to generate equivalent atoms: #1 -x,-y+1,-z

**Table S4.** Selected bond lengths (Å) and angles (deg) of **4**.

|                   |           |                   |           |
|-------------------|-----------|-------------------|-----------|
| Cu(1)-N(12)       | 1.956(9)  | Cu(1)-N(1)        | 1.969(10) |
| Cu(1)-O(2W)       | 2.103(9)  | Cu(1)-N(2)        | 2.106(11) |
| Cu(1)-N(11)       | 2.283(11) | Cu(1)-O(21)       | 2.317(8)  |
| Cu(2)-N(7)        | 1.977(10) | Cu(2)-N(6)        | 2.010(9)  |
| Cu(2)-N(5)        | 2.030(10) | Cu(2)-O(1W)       | 2.029(8)  |
| Cu(2)-N(8)        | 2.355(11) | Cu(2)-O(5)        | 2.479(7)  |
| N(12)-Cu(1)-N(1)  | 178.9(4)  | N(12)-Cu(1)-O(2W) | 87.5(4)   |
| N(1)-Cu(1)-O(2W)  | 91.9(4)   | N(12)-Cu(1)-N(2)  | 99.9(4)   |
| N(1)-Cu(1)-N(2)   | 80.4(4)   | O(2W)-Cu(1)-N(2)  | 165.3(4)  |
| N(12)-Cu(1)-N(11) | 77.9(4)   | N(1)-Cu(1)-N(11)  | 103.0(4)  |
| O(2W)-Cu(1)-N(11) | 85.1(4)   | N(2)-Cu(1)-N(11)  | 108.8(4)  |
| N(12)-Cu(1)-O(21) | 92.6(3)   | N(1)-Cu(1)-O(21)  | 86.3(4)   |
| O(2W)-Cu(1)-O(21) | 83.1(3)   | N(2)-Cu(1)-O(21)  | 83.9(4)   |
| N(11)-Cu(1)-O(21) | 165.2(4)  | N(7)-Cu(2)-N(6)   | 179.9(5)  |
| N(7)-Cu(2)-N(5)   | 99.1(4)   | N(6)-Cu(2)-N(5)   | 80.8(4)   |
| N(7)-Cu(2)-O(1W)  | 89.8(4)   | N(6)-Cu(2)-O(1W)  | 90.3(4)   |
| N(5)-Cu(2)-O(1W)  | 164.3(4)  | N(7)-Cu(2)-N(8)   | 76.7(4)   |
| N(6)-Cu(2)-N(8)   | 103.3(4)  | N(5)-Cu(2)-N(8)   | 103.6(4)  |
| O(1W)-Cu(2)-N(8)  | 90.9(4)   | O(5)-Cu(2)-N(6)   | 85.4(2)   |
| O(5)-Cu(2)-N(5)   | 86.2(7)   | O(5)-Cu(2)-N(7)   | 94.4(8)   |
| O(5)-Cu(2)-N(8)   | 167.3(1)  | O(5)-Cu(2)-O(1W)  | 80.3(3)   |

Symmetry transformations used to generate equivalent atoms:  $-x+1, -y, -z+1$  #2  $-x, -y+3, -z$

**Table S5.** Selected bond lengths (Å) and angles (deg) of **5**.

|                   |           |                    |           |
|-------------------|-----------|--------------------|-----------|
| Cu(1)-O(13)       | 1.929(6)  | Cu(1)-N(1)         | 2.003(10) |
| Cu(1)-O(2)#1      | 2.063(7)  | Cu(1)-N(2)         | 2.107(9)  |
| Cu(2)-N(8)        | 1.974(8)  | Cu(2)-N(5)         | 2.011(9)  |
| Cu(2)-N(4)        | 2.038(10) | Cu(2)-N(9)         | 2.107(10) |
| O(13)-Cu(1)-N(1)  | 136.8(3)  | O(13)-Cu(1)-O(2)#1 | 92.7(3)   |
| N(1)-Cu(1)-O(2)#1 | 121.6(3)  | O(13)-Cu(1)-N(2)   | 124.5(3)  |
| N(1)-Cu(1)-N(2)   | 81.4(4)   | O(2)#1-Cu(1)-N(2)  | 94.5(3)   |
| N(8)-Cu(2)-N(5)   | 132.5(4)  | N(8)-Cu(2)-N(4)    | 126.0(4)  |
| N(5)-Cu(2)-N(4)   | 81.4(5)   | N(8)-Cu(2)-N(9)    | 80.5(3)   |
| N(5)-Cu(2)-N(9)   | 123.2(4)  | N(4)-Cu(2)-N(9)    | 118.6(4)  |

Symmetry transformations used to generate equivalent atoms: #1  $-x, -y+2, -z$  #2  $-x-1/2, -y+3/2, -z$  #3  $-x-1/2, y+1/2, -z+1/2$  #4  $-x-1/2, y-1/2, -z+1/2$  #5  $-x, y, -z+1/2$

**Table S6.** Selected bond lengths (Å) and angles (deg) of **6**.

|                 |          |                 |          |
|-----------------|----------|-----------------|----------|
| Cu(1)-N(6)      | 2.023(7) | Cu(1)-N(2)      | 2.047(7) |
| Cu(1)-N(1)      | 2.079(6) | Cu(1)-N(5)      | 2.086(7) |
| Cu(2)-N(7)      | 2.008(9) | Cu(2)-N(12)     | 2.056(7) |
| Cu(2)-N(8)      | 2.068(7) | Cu(2)-N(10)     | 2.076(9) |
| N(6)-Cu(1)-N(2) | 133.4(3) | N(6)-Cu(1)-N(1) | 127.9(3) |

|                   |          |                  |          |
|-------------------|----------|------------------|----------|
| N(2)-Cu(1)-N(1)   | 80.3(3)  | N(6)-Cu(1)-N(5)  | 81.2(3)  |
| N(2)-Cu(1)-N(5)   | 111.6(3) | N(1)-Cu(1)-N(5)  | 128.1(3) |
| N(7)-Cu(2)-N(12)  | 145.8(3) | N(7)-Cu(2)-N(8)  | 82.1(3)  |
| N(12)-Cu(2)-N(8)  | 122.5(3) | N(7)-Cu(2)-N(10) | 123.6(3) |
| N(12)-Cu(2)-N(10) | 77.4(3)  | N(8)-Cu(2)-N(10) | 102.6(3) |

Symmetry transformations used to generate equivalent atoms: #1 -x,-y-1,-z    #2 -x+1,-y,-z    #3 -x+2,-y,-z+1  
#4 -x,-y+1,-z+1    #5 -x+1,-y+1,-z+1

**Table S7.** Selected bond lengths (Å) and angles (deg) of **7**.

|                     |          |                   |          |
|---------------------|----------|-------------------|----------|
| Cu(1)-N(2)          | 2.005(5) | Cu(1)-N(5)#1      | 2.021(5) |
| Cu(1)-N(6)#1        | 2.091(5) | Cu(1)-N(1)        | 2.120(5) |
| N(2)-Cu(1)-N(5)#1   | 136.7(2) | N(2)-Cu(1)-N(6)#1 | 130.0(2) |
| N(5)#1-Cu(1)-N(6)#1 | 80.5(2)  | N(2)-Cu(1)-N(1)   | 79.5(2)  |
| N(5)#1-Cu(1)-N(1)   | 121.7(2) | N(6)#1-Cu(1)-N(1) | 111.4(2) |

Symmetry transformations used to generate equivalent atoms: #1 -x,y+1/2,-z+1/2    #2 -x+1,-y+1,-z    #3 -  
x,y-1/2,-z+1/2

### 3. Additional measurements for compounds 1-7

#### 3.1 Photocatalysis properties

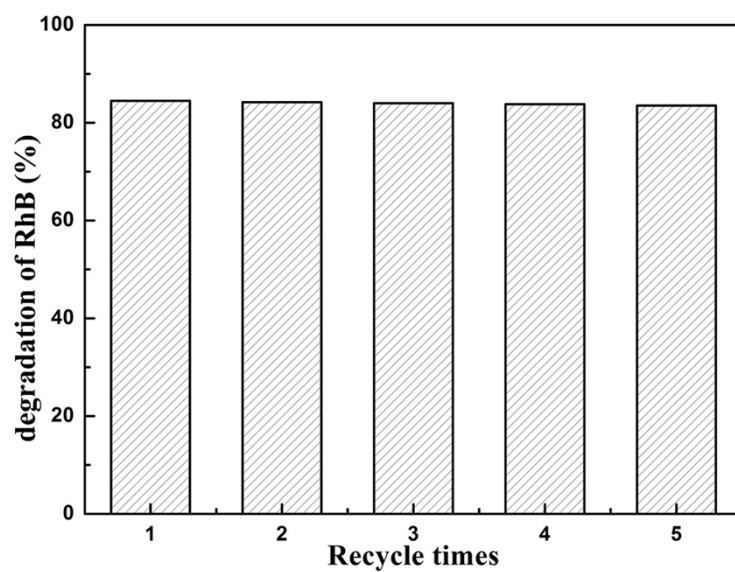

**Figure S22** The recycle times on the RhB degradation with compound **4** as catalyst.

### 3.2 IR spectra

In the IR spectrum of **1**, the characteristic peaks at 800 and 955  $\text{cm}^{-1}$  are attributed to the  $\nu(\text{Mo-O-Mo})$  and  $\nu(\text{Mo=O})$  of the  $[\text{Mo}_6\text{O}_{19}]^{2-}$  polyanions, respectively (Fig. S23). The IR spectra of compounds **2-7** show characteristic peaks of the polyoxoanion  $[\text{Mo}_8\text{O}_{26}]^{4-}$  in the range of 660-953  $\text{cm}^{-1}$  for **2**, 673-939  $\text{cm}^{-1}$  for **3**, 657-945  $\text{cm}^{-1}$  for **4**, 642-944  $\text{cm}^{-1}$  for **5**, 659-916  $\text{cm}^{-1}$  for **6** and 659-947  $\text{cm}^{-1}$  for **7**, which are ascribed to the vibrations of  $\nu(\text{Mo-O}_t)$  and  $\nu(\text{Mo-O-Mo})$  (Fig. S24- S29). In addition, for all compounds, the peaks at ca. 3110  $\text{cm}^{-1}$  are attributed to the vibrations of the  $\nu(\text{C-H})$  in phenyl, pyrazole and pyridyl rings of *Lo* and *Lp* ligand. Peaks in the regions of 1645-1434  $\text{cm}^{-1}$  may belong to the vibrations of the  $\nu(\text{C=C})$ ,  $\nu(\text{C=N})$  and  $\nu(\text{C=N})$  in phenyl, pyrazole and pyridyl rings of *Lo* and *Lp* ligand in **1-7**. The peaks at ca. 3440  $\text{cm}^{-1}$  are attributed to the vibrations of  $\nu(\text{H}_2\text{O})$ .

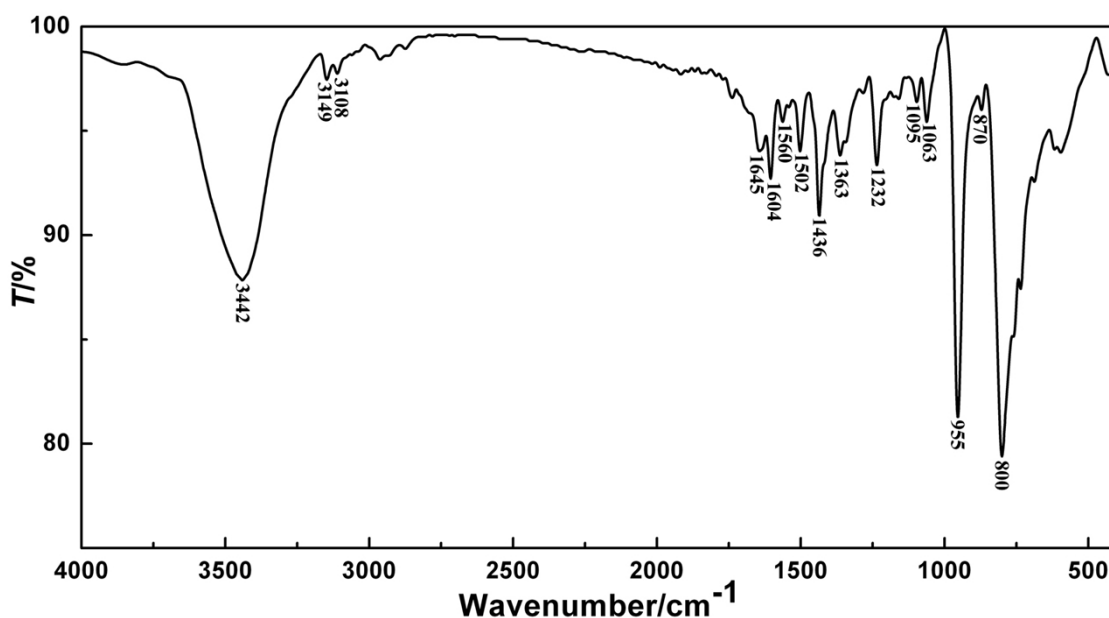

Figure S23 IR spectrum of compound **1**.



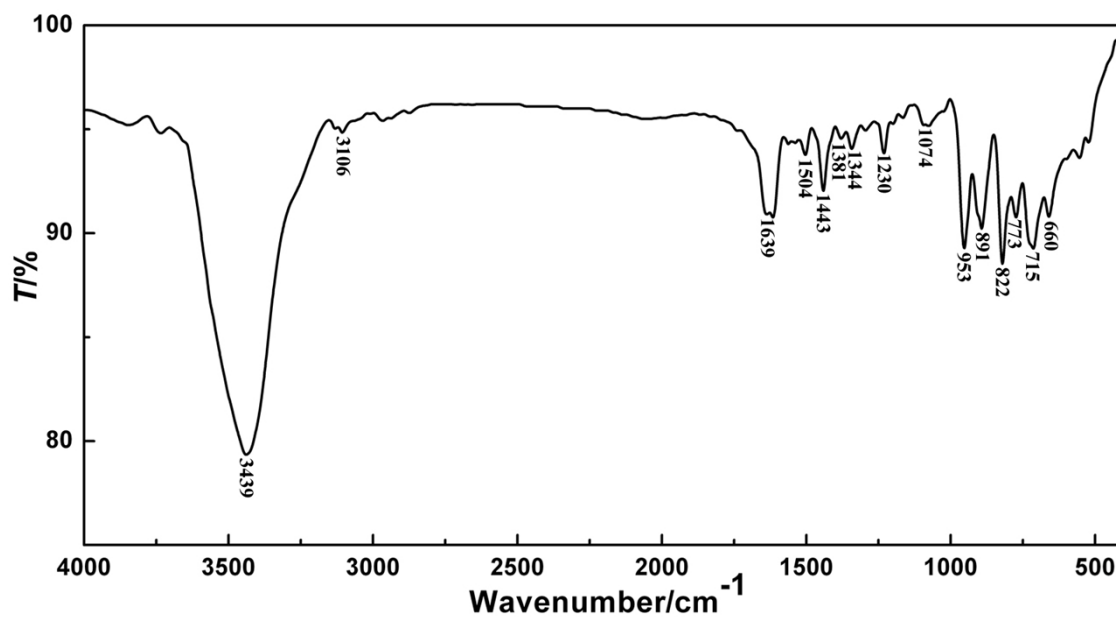

Figure S24 IR spectrum of compound 2.

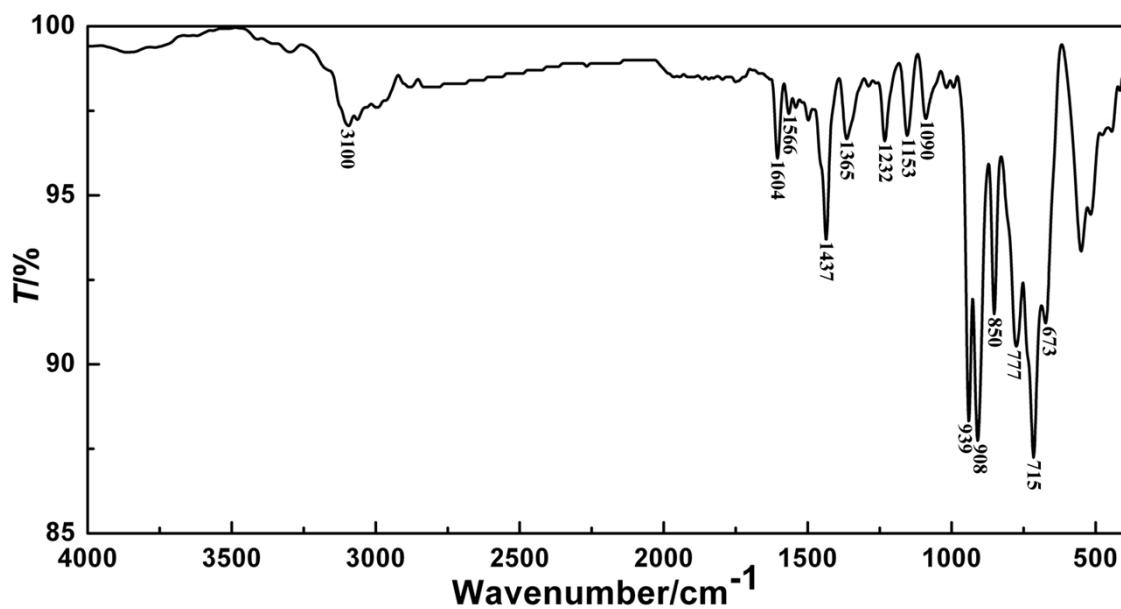

Figure S25 IR spectrum of compound 3.

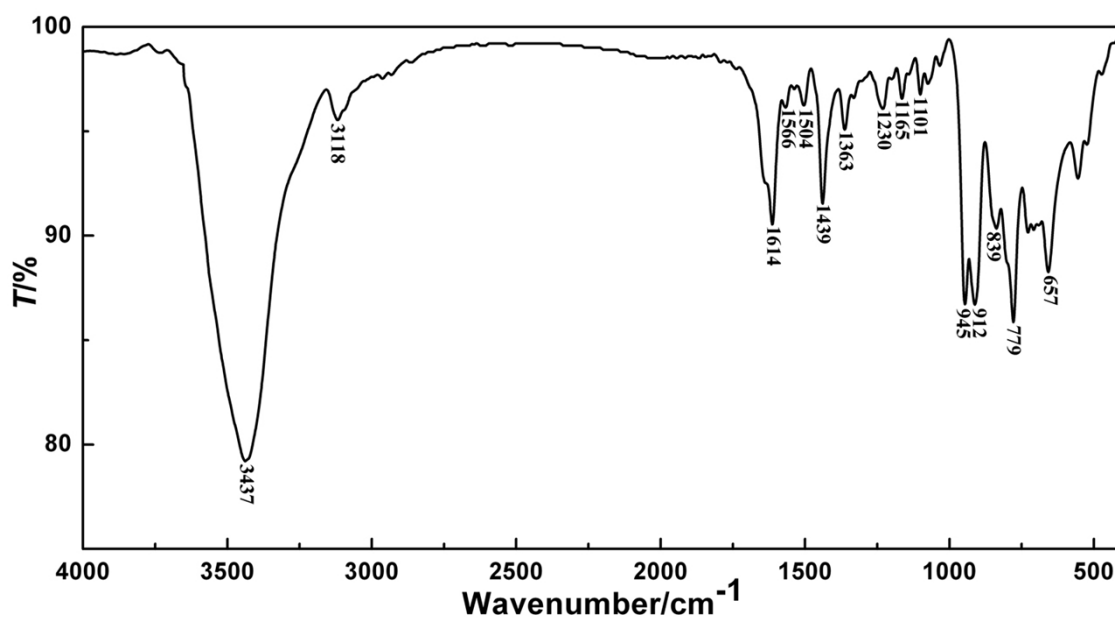

Figure S26 IR spectrum of compound 4.

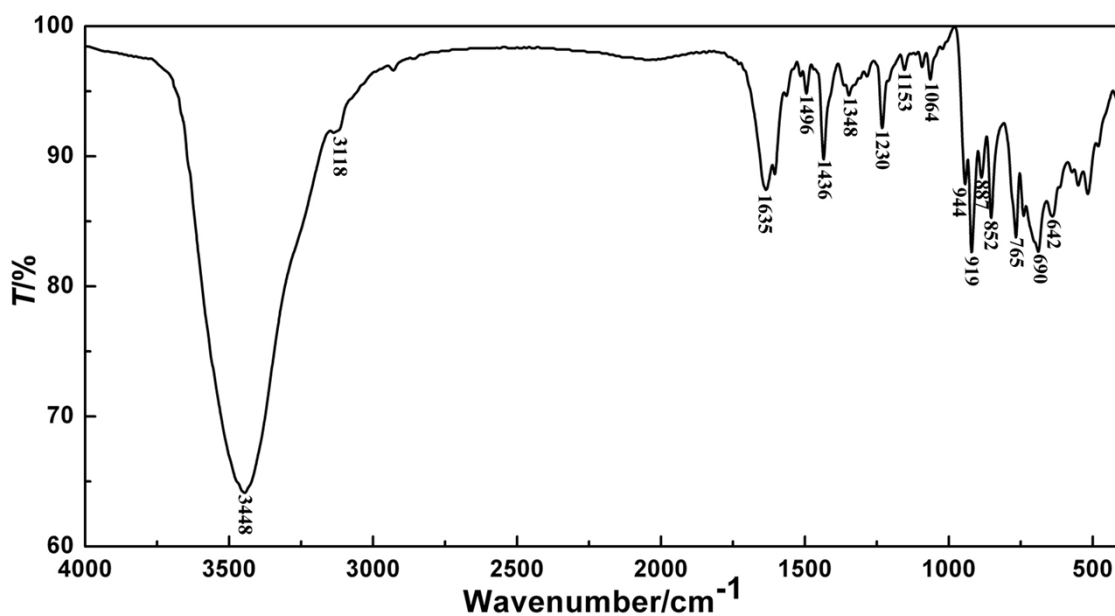

Figure S27 IR spectrum of compound 5.

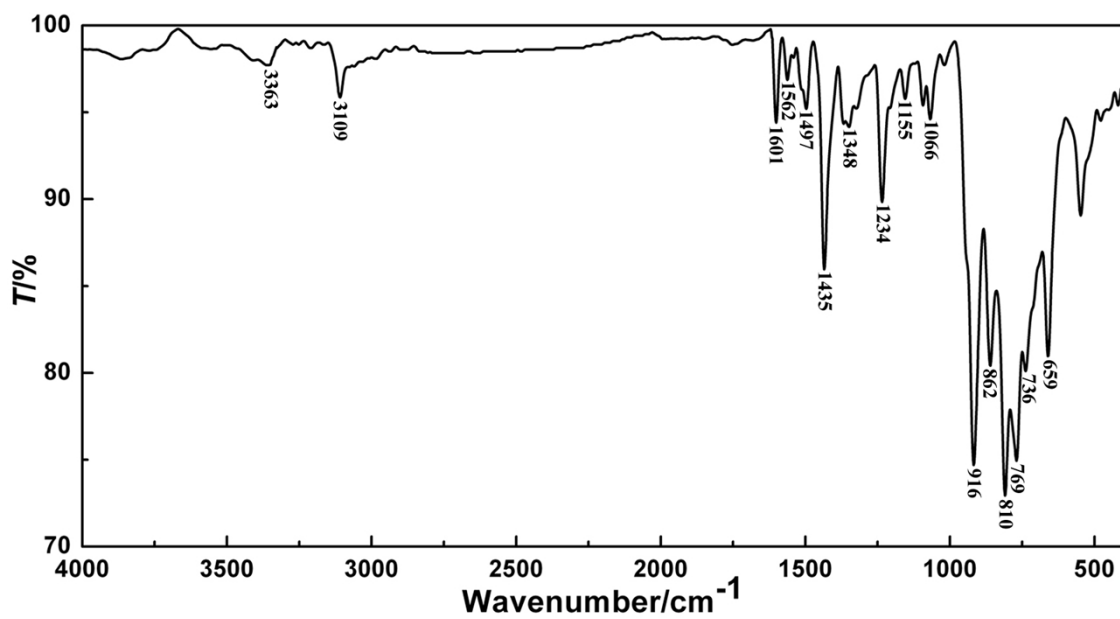

Figure S28 IR spectrum of compound 6.

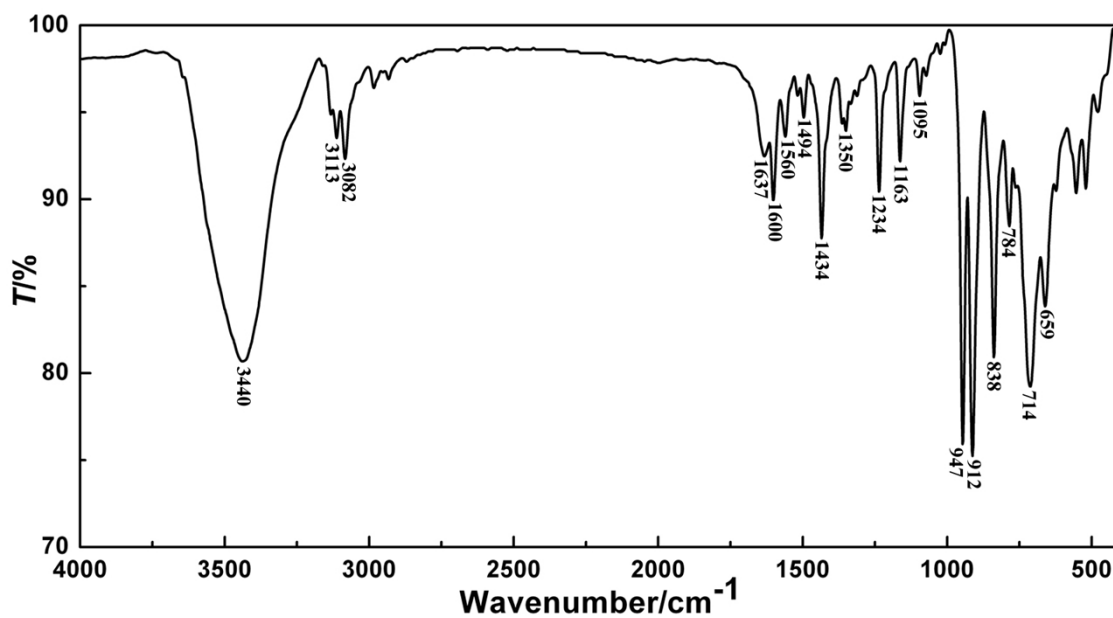

Figure S29 IR spectrum of compound 7.

### 3.3 TG Analyses

The TG curve of compound **1** shows one weight loss step (Fig. S30). The whole weight loss of 43.48% occurring from 325 to 595 °C is mainly ascribed to the decomposition and loss of *Lo* ligands in **1** (calcd. 43.76%).

The TG curve of compound **2** shows two continuous weight loss steps (Fig. S31). The first weight loss of 1.43 % in the temperature range of 75 ~ 145°C corresponds to the loss of eight lattice water molecules (calcd. 1.69%). The second weight loss of 36.85% occurring from 325 to 590 °C is mainly ascribed to the decomposition and loss of *Lo* ligands (calcd. 36.78%). The whole weight loss of 38.28 % is in agreement with the calculated value 38.47%.

The TG curve of compound **3** (Fig. S32) shows the first weight loss of 1.82% in the temperature range of 75 ~ 120 °C corresponding to three lattice water molecules (calculated value 1.89%). The second weight loss of 37.51 % from 330 to 610 °C is ascribed to decomposition and loss of *pzpy* and *Lo* ligands (calcd. 37.57%). The whole weight loss of 39.33% is in agreement with the calculated value 39.46%.

The TG curve of compound **4** also displays two continuous weight loss steps (Fig. S33). The first weight loss of 3.29 % in the temperature range of 85 ~ 140 °C corresponds to the loss of four coordinated water molecules and four lattice water molecules (calcd. 3.32%). The second weight loss in the range of 335 ~ 610 °C is 35.89% and attributed to the loss of *Lp* ligands (calcd. 36.17%). The whole weight loss of 39.18 % is in agreement with the calculated value 39.49%.

The TG curve of compound **5** displays one weight loss steps (Fig. S34). The whole weight loss of 44.31% occurring from 320 to 620 °C is mainly attributed to the decomposition and loss of *Lp* ligands in **5** (calcd. 44.66%).

The TG curve of compound **6** shows one weight loss steps (Fig. S35). The whole weight loss of 52.20% occurring from 330 to 630 °C is mainly ascribed to the decomposition and loss of *Lp* ligands in **6** (calcd. 52.14%).

The TG curve of compound **7** displays one weight loss steps (Fig. S36). The whole weight loss of 41.85% occurring from 325 to 640 °C is mainly attributed to the decomposition and loss of *Lp* ligands and *bmin* cation in **7** (calcd. 41.94%).

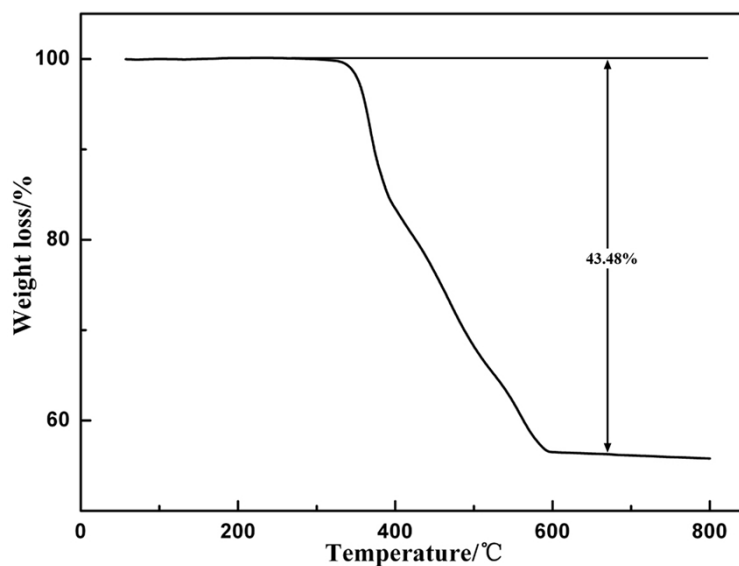

Figure S30 TG curve of compound 1.

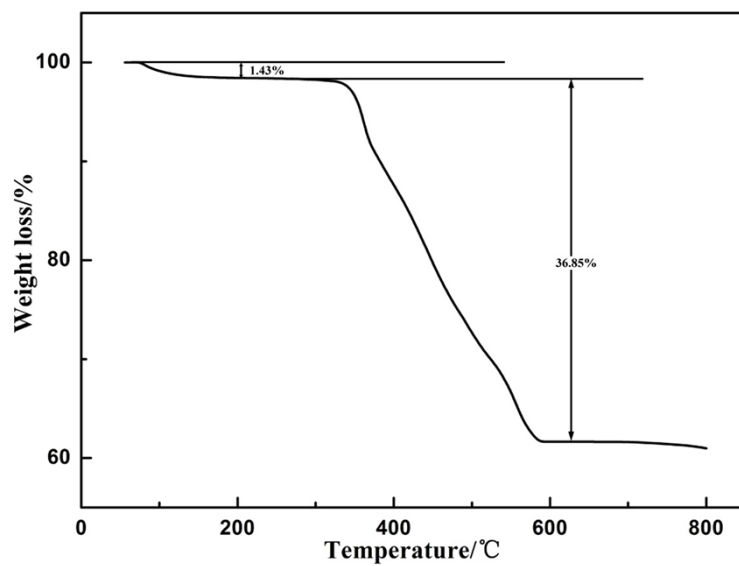

Figure S31 TG curve of compound 2.

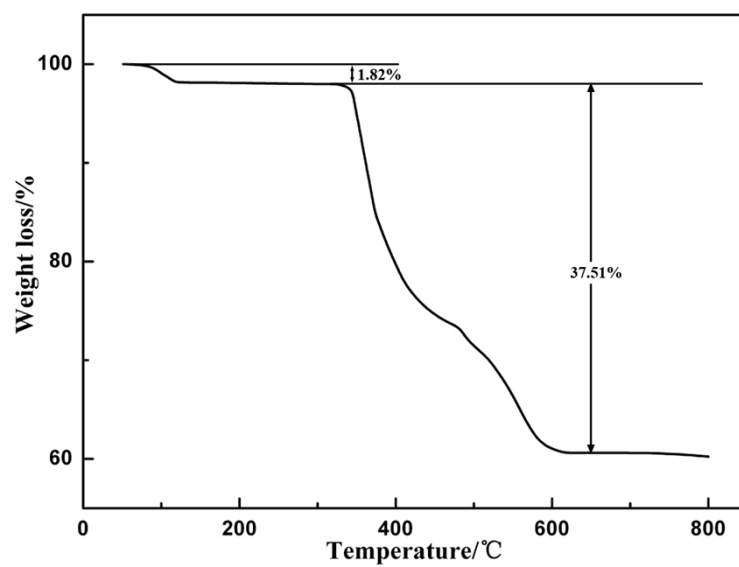

Figure S32 TG curve of compound 3.

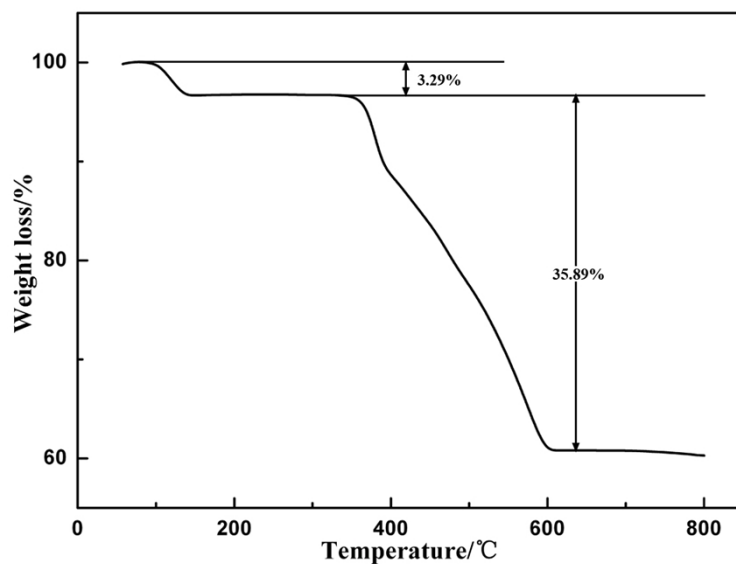

Figure S33 TG curve of compound 4.

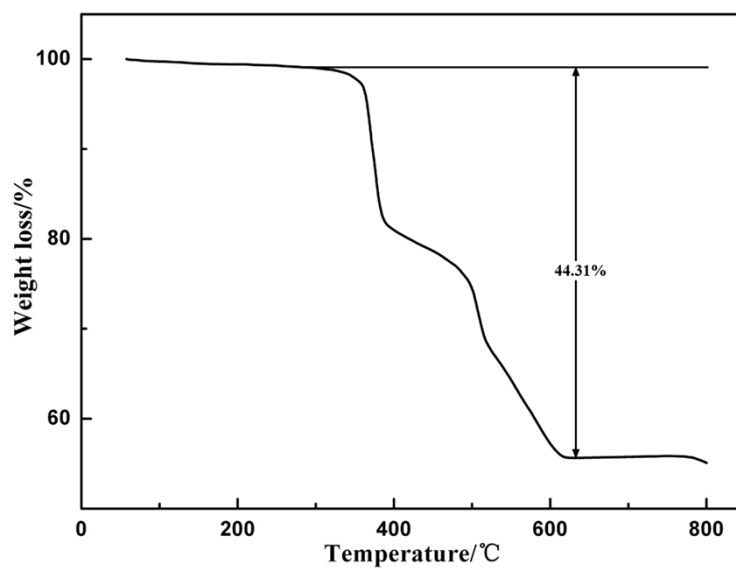

Figure S34 TG curve of compound 5.

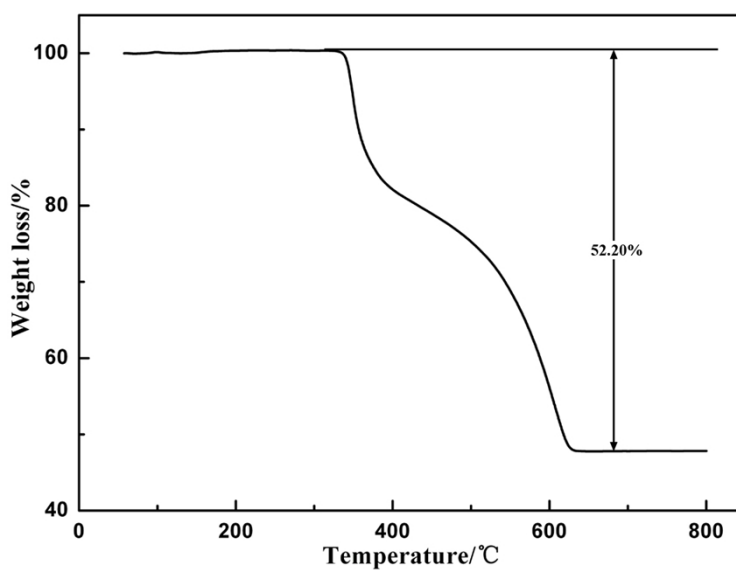

Figure S35 TG curve of compound 6.



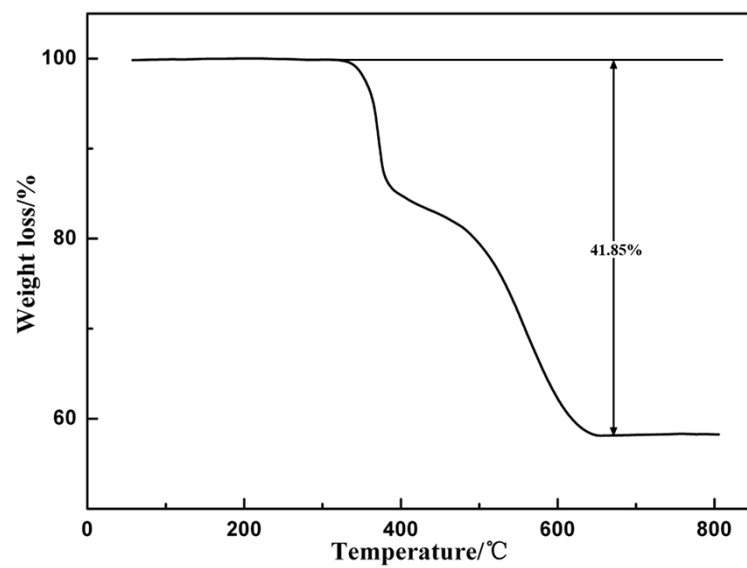

**Figure S36** TG curve of compound 7.

### 3.4 Powder X-ray diffractions

In order to check the phase purity of compounds **1-7**, the PXRD patterns of them were recorded at room temperature. As shown in Figs. S37-S43, the peak positions of simulated and experimental patterns of compounds **1-7** are in agreement with each other, indicating the good phase purity of them. The differences in intensity are owing to the preferred orientations of the crystalline powder samples.

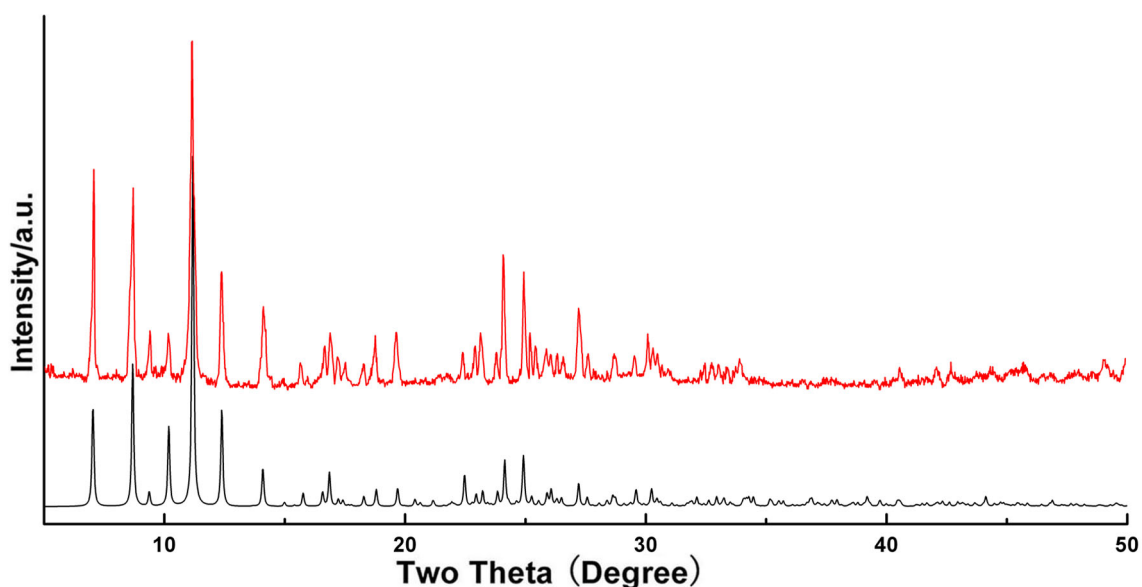

**Figure S37** Measured (red) and simulated (black) XRD patterns of compound **1**.

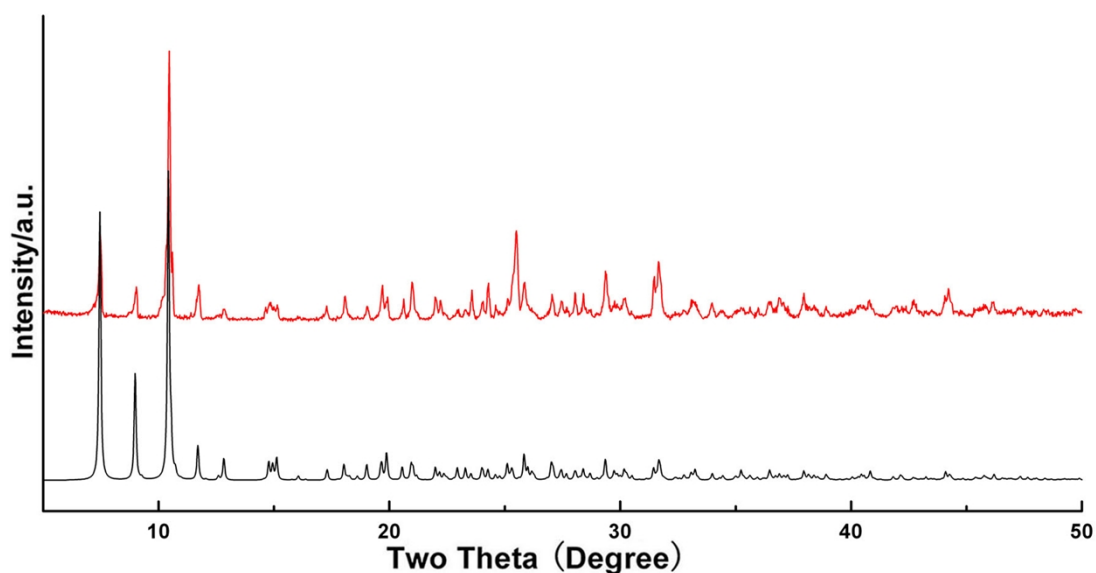

**Figure S38** Measured (red) and simulated (black) XRD patterns of compound **2**.

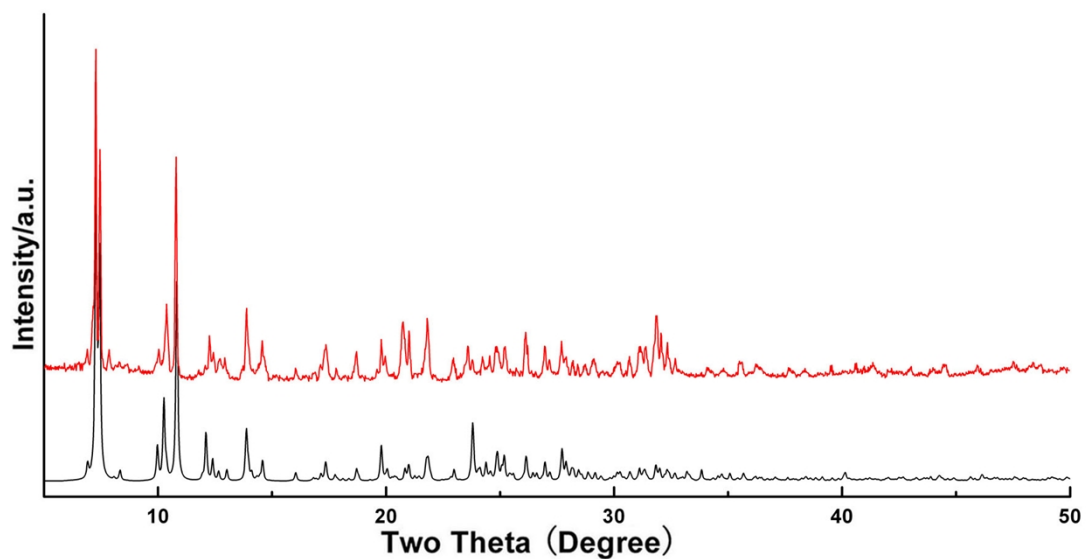

**Figure S39** Measured (red) and simulated (black) XRD patterns of compound **3**.

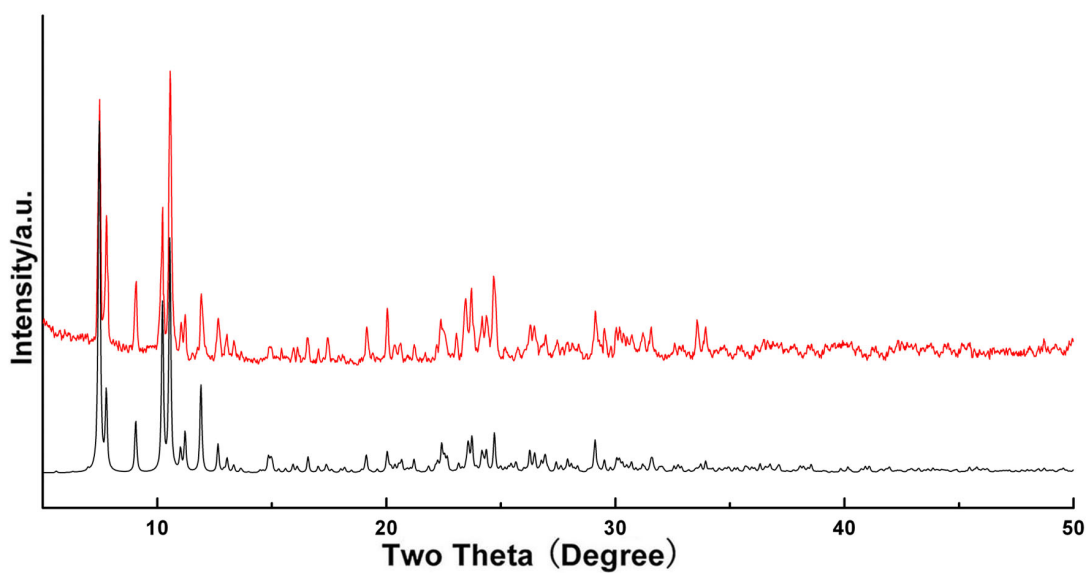

**Figure S40** Measured (red) and simulated (black) XRD patterns of compound **4**.

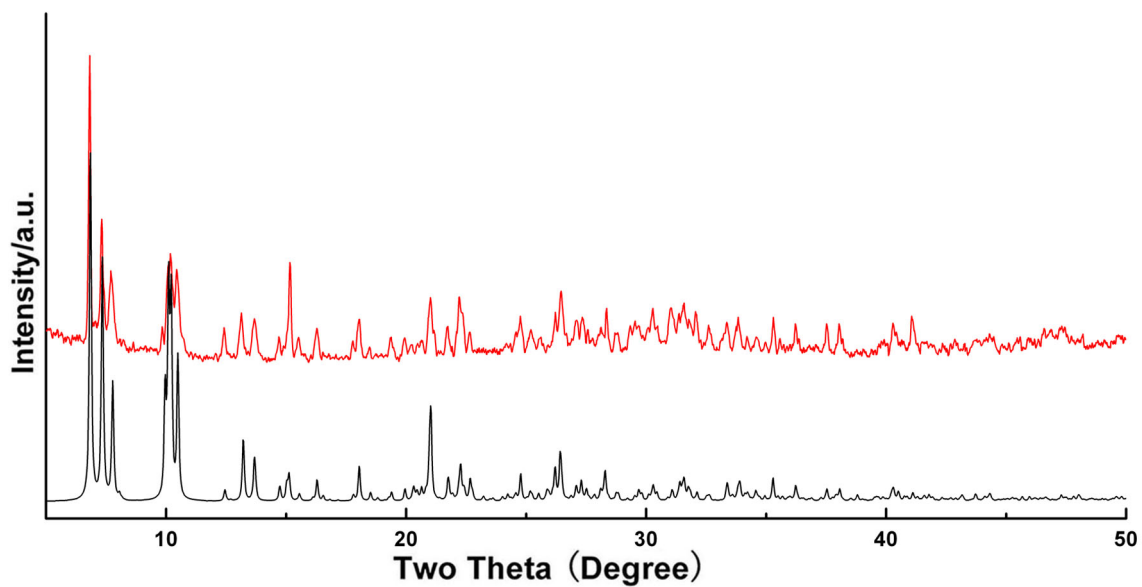

**Figure S41** Measured (red) and simulated (black) XRD patterns of compound **5**.

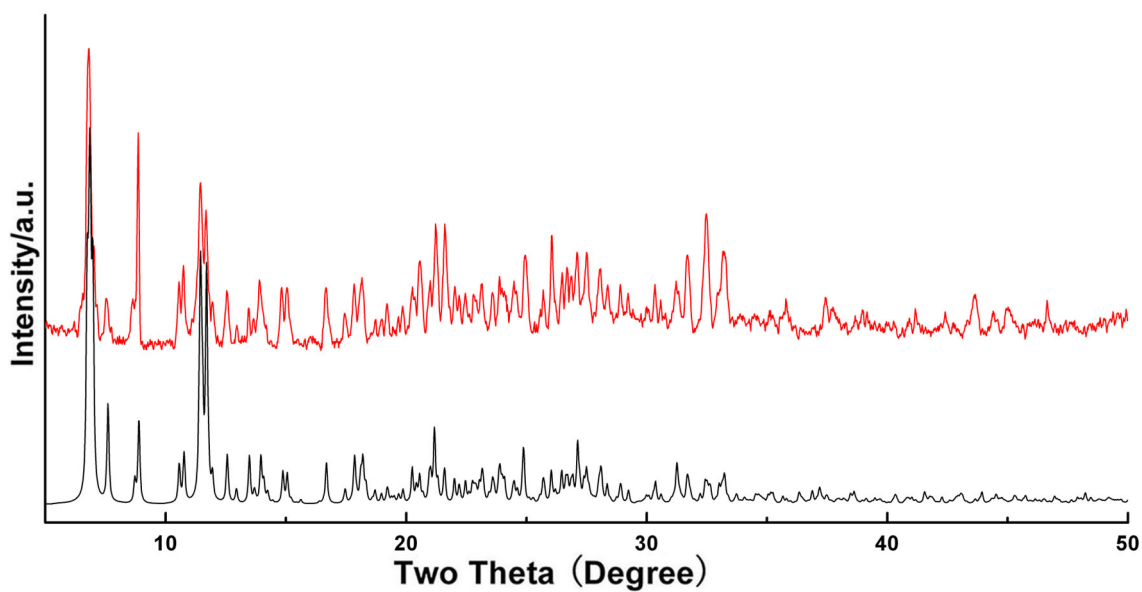

**Figure S42** Measured (red) and simulated (black) XRD patterns of compound **6**.

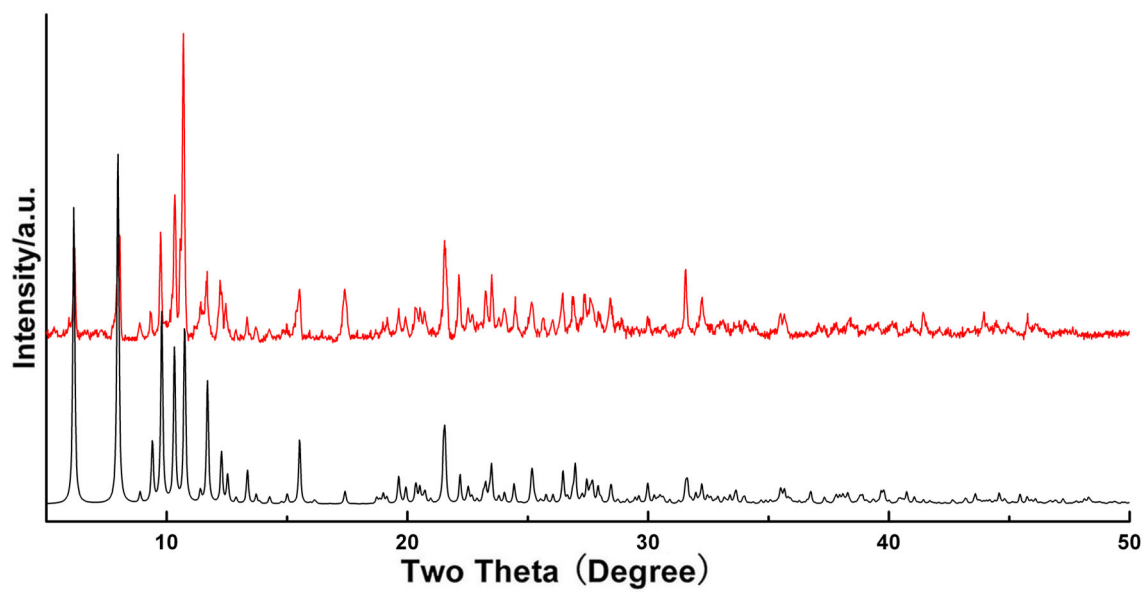

**Figure S43** Measured (red) and simulated (black) XRD patterns of compound 7.
